# Supplementary material for: Triethanolamine doped multilayer MoS2 field effect transistors
Source: Royal Society of Chemistry journal article supplement (doi:10.1039/c7cp00589j), 2017-01-01
Supplement: c7cp00589j1.pdf [file c7cp00589j1.pdf]

**Supplementary Information**

# Triethanolamine Doped Multilayer MoS<sub>2</sub>

## Field Effect Transistors

*Min-Yeul Ryu<sup>a</sup>, Ho-Kyun Jang<sup>a</sup>, Kook Jin Lee<sup>a</sup>, Mingxing Piao<sup>b</sup>, Seung-Pil Ko<sup>a</sup>, Minju Shin<sup>a</sup>, Junghwan Huh<sup>\*a</sup>, and Gyu-Tae Kim<sup>\*a</sup>*

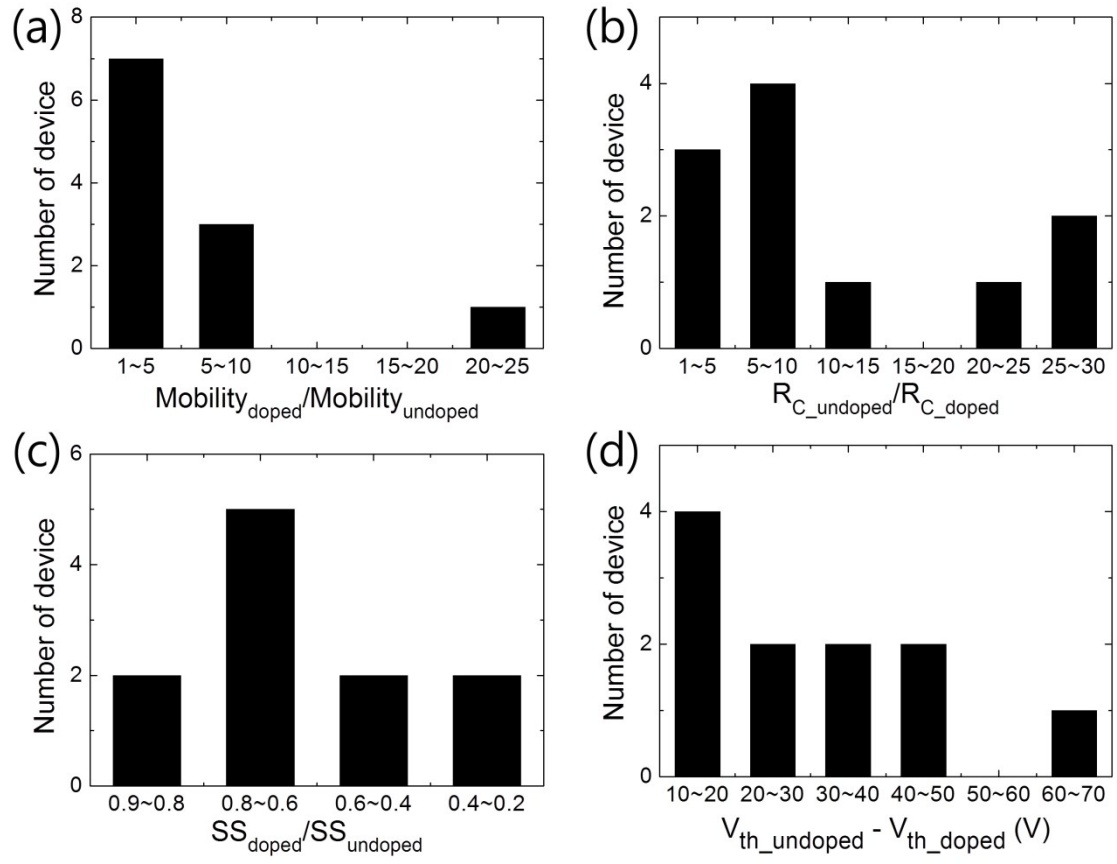

**Figure S1** Distribution of mobility ratio (a), contact resistance ( $R_{\text{C}}$ ) ratio (b), subthreshold swing (SS) ratio (c) and threshold voltage ( $V_{\text{th}}$ ) shift (d) before and after the doping process.

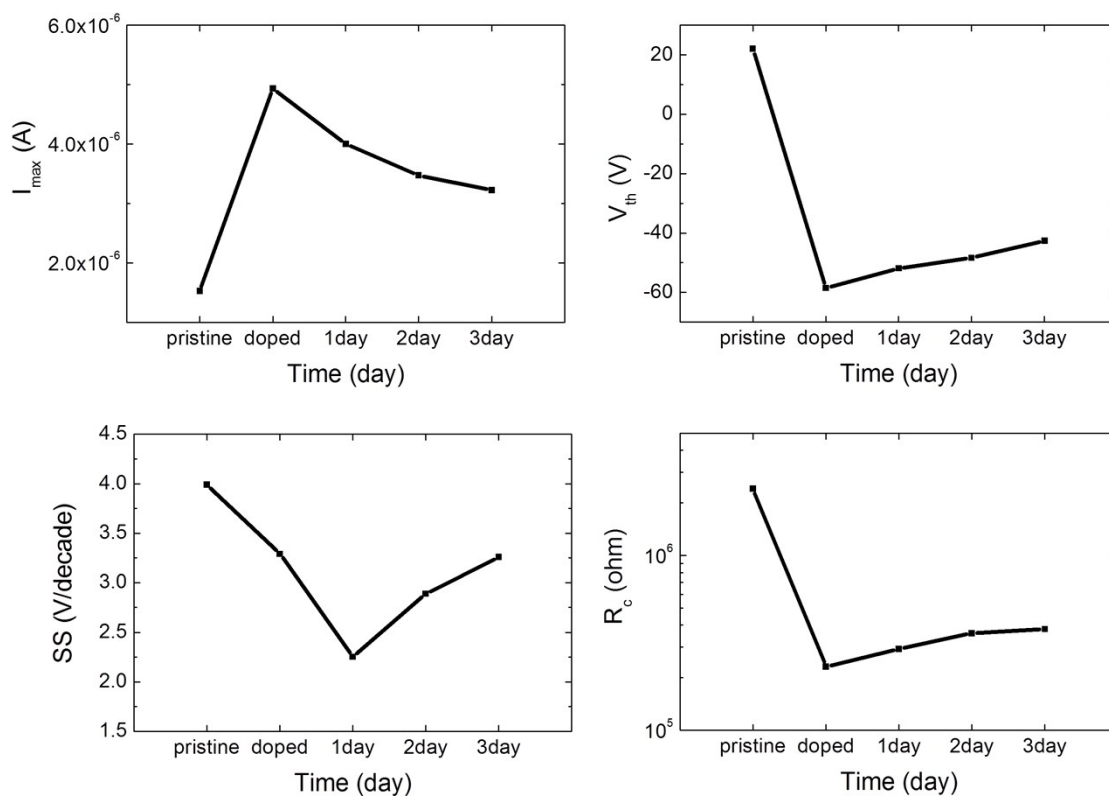

**Figure. S2** Stability of on-current (a), threshold voltage ( $V_{th}$ ) (b), subthreshold swing (SS) (c) and contact resistance ( $R_c$ ) (d) in air for 3 days before and after the doping process.

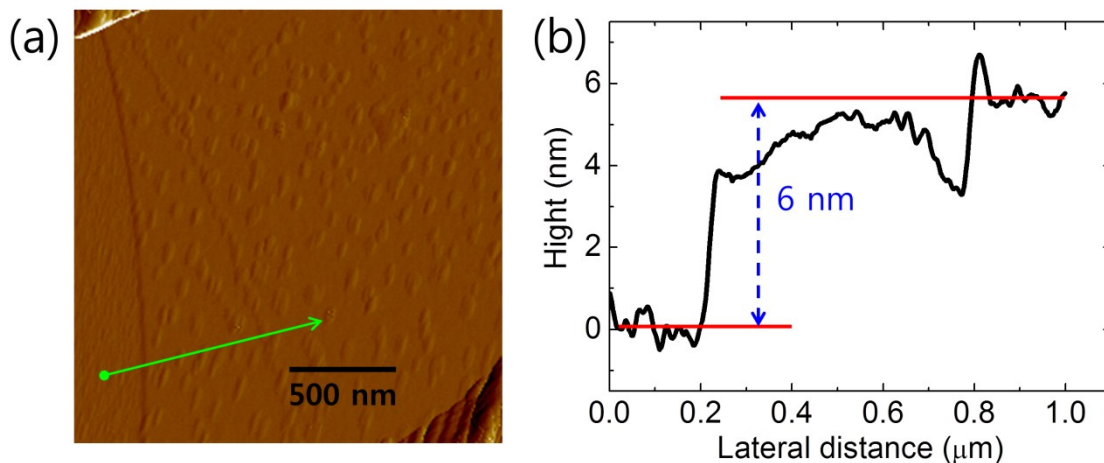

**Figure. S3** (a) AFM image of multilayer  $MoS_2$ . (b) Height profile measured along the green line in figure S3(a).
